# Supplementary material for: Identification of Lymphatic and Hematogenous Routes of Rapidly Labeled Radioactive and Fluorescent Exosomes through Highly Sensitive Multimodal Imaging
Source: PubMed Central journal article supplement (PMC7660226; doi:10.3390/ijms21217850), 2020-10-22
Supplement: ijms-21-07850-s001.pdf [file ijms-21-07850-s001.pdf]

**Table S1:** Hydrodynamic size, PDI (polydispersion index) and zeta potential of exosomes according to the labeling steps

|                  | <b>Exo</b>  | <b>Exo-NOTA</b> | <b>Cy7-Exo-NOTA</b> | <b>Cy7-Exo-NOTA-<sup>64</sup>Cu</b> |
|------------------|-------------|-----------------|---------------------|-------------------------------------|
| Size( nm)        | 160.3±28.06 | 163.7±19.44     | 189.9±21.33         | 185.6±23.18                         |
| PDI <sup>1</sup> | 0.306       | 0.370           | 0.494               | 0.457                               |
| Zeta (Mv)        | -21.8±2.95  | -18.8±2.655     | -15.5±1.97          | -14.9±2.79                          |

<sup>1</sup>polydispersion index.

## Supplementary Figures

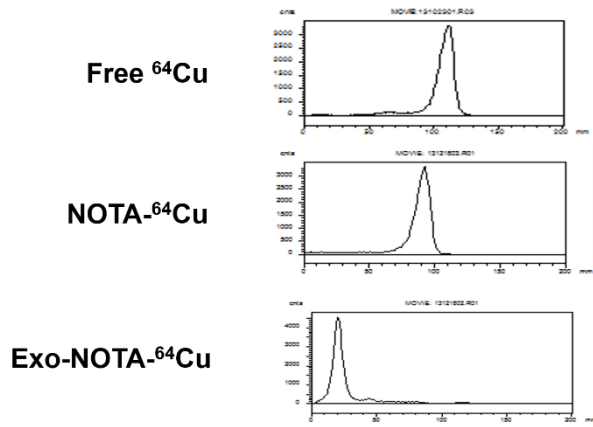

**Figure S1: Thin layer chromatography of  $^{64}\text{Cu}$ .**

After labelling with radioisotopes, thin layer chromatography indicates labelling efficiency.

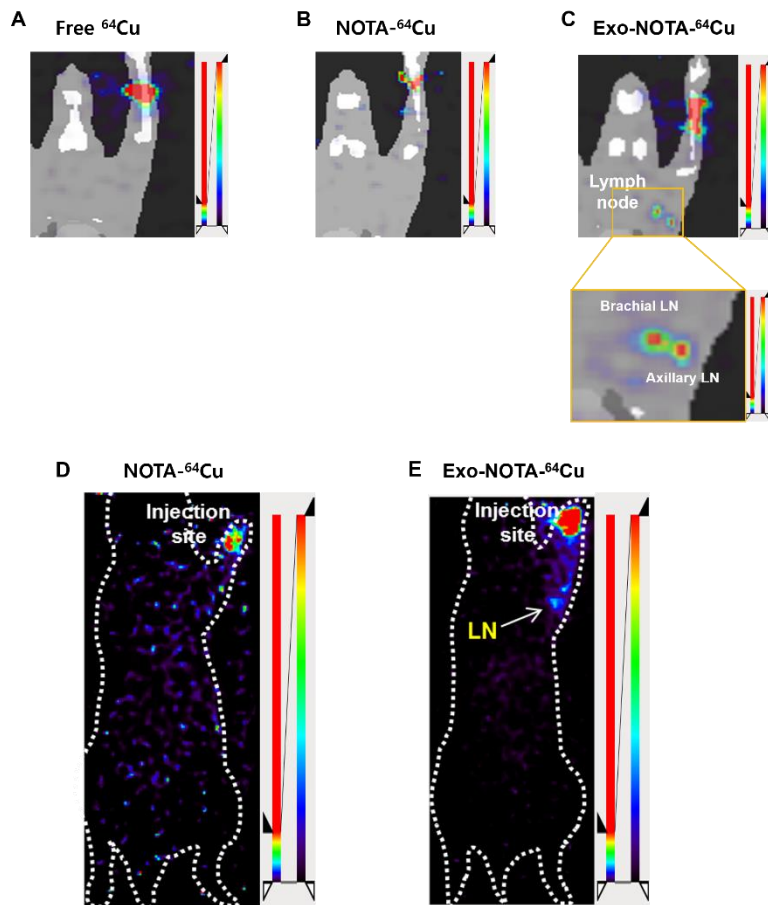

**Figure S2:  $^{64}\text{Cu}$  images in the lymphatic route**

(A) Free  $^{64}\text{Cu}$  is compared with NOTA- $^{64}\text{Cu}$  (B) and Exo-NOTA- $^{64}\text{Cu}$  (C). (D, E) Whole body PET images indicate no significant uptake in other organs.

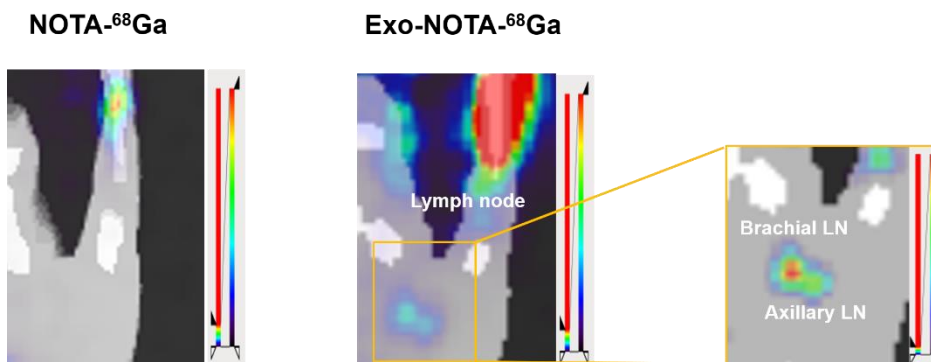

**Figure S3:  $^{68}\text{Ga}$ -labeled exosomes in the lymphatic route.**

Exo-NOTA- $^{68}\text{Ga}$  compared with NOTA- $^{68}\text{Ga}$ .

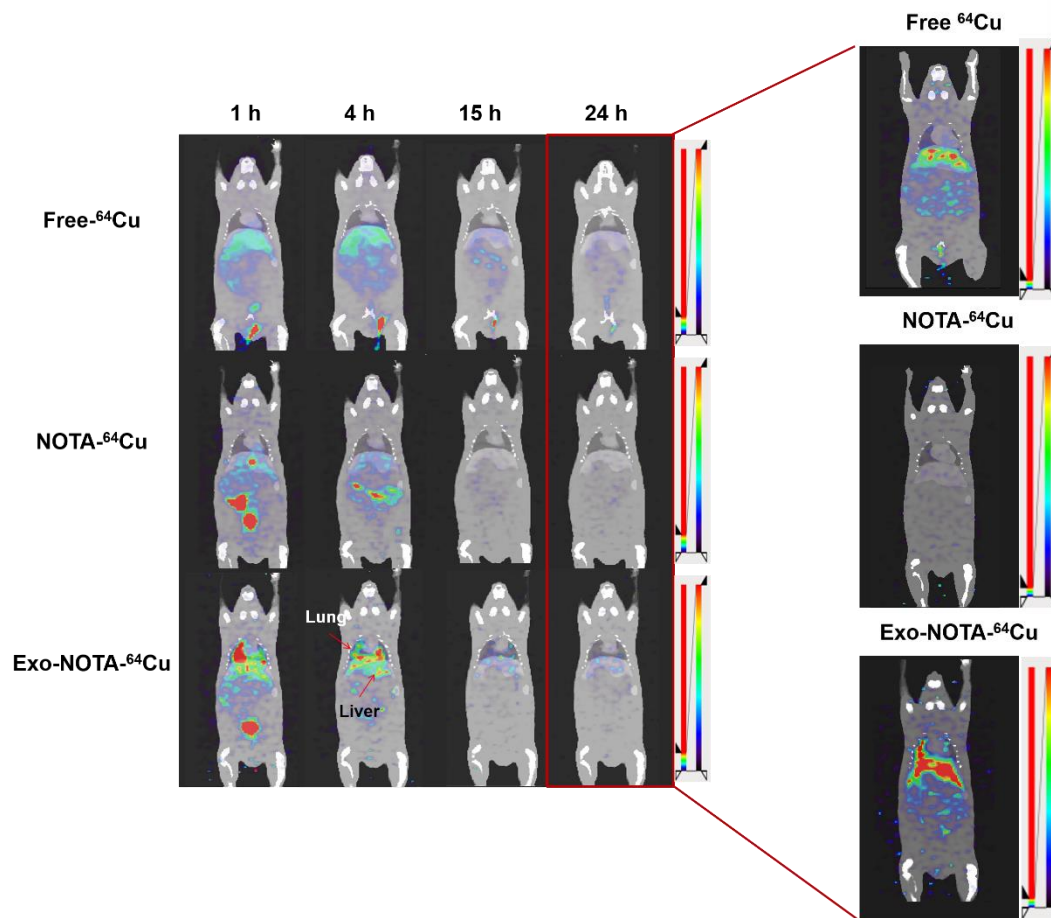

**Figure S4: Free- $^{64}\text{Cu}$  images in the hematogenous route.**

Free  $^{64}\text{Cu}$  is compared with NOTA- $^{64}\text{Cu}$  and Exo-NOTA- $^{64}\text{Cu}$ .

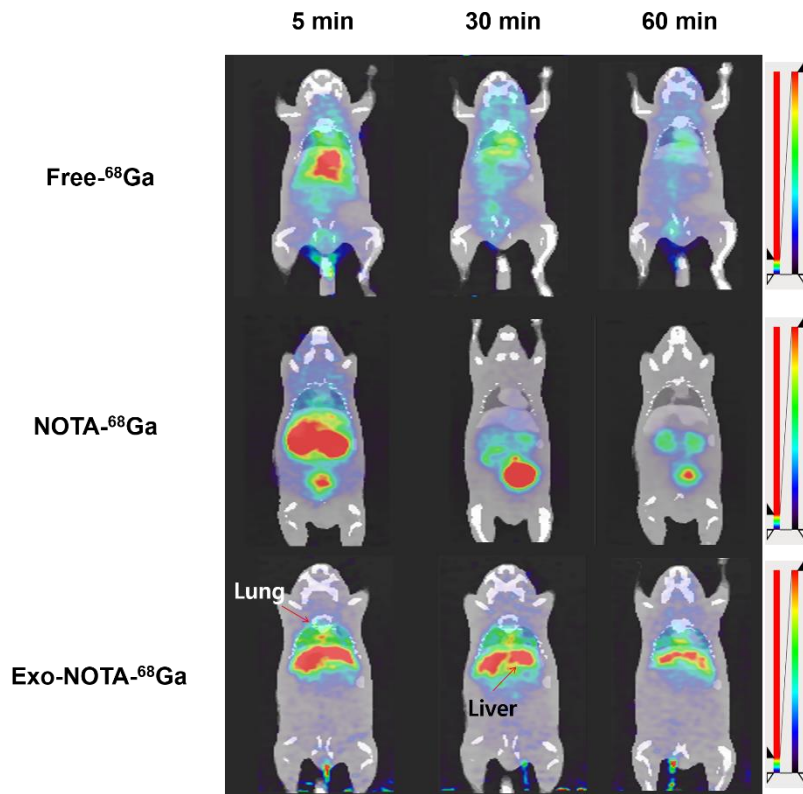

**Figure S5: <sup>68</sup>Ga-labeled exosomes in the hematogenous route.**

Exo-NOTA-<sup>68</sup>Ga is compared with Free-<sup>68</sup>Ga and NOTA-<sup>68</sup>Ga.
